# Supplementary material
Source: PubMed Central journal article supplement (PMC9205182)
Supplement: NIHMS1813049-supplement-Supplementary_Material.pdf [file NIHMS1813049-supplement-Supplementary_Material.pdf]

*Supporting Information*

**Allosteric Control of**

**ACE2 Peptidase Domain Dynamics**

Francesco Trozzi, Nischal Karki, Zilin Song, Niraj Verma,  
Elfi Kraka, Brian Zoltowski, and Peng Tao\*

Department of Chemistry, Center for Research Computing, Center for Drug Discovery, Design,  
and Delivery (CD4), Southern Methodist University, Dallas, US

\*Correspondence and Lead-contact: Peng Tao (ptao@smu.edu)

**Table S1.** Naming convention for ACE2 PD.

| Residue   | Feature key | Name                            | Residue   | Feature key | Name                           |
|-----------|-------------|---------------------------------|-----------|-------------|--------------------------------|
| 21 - 52   | Helix       | $\alpha 1$                      | 331 - 339 | Turn        | $\alpha 20$ - $\beta 21$ loop  |
| 56 - 77   | Helix       | $\alpha 2$                      | 347 - 352 | Beta strand | $\beta 21$                     |
| 78 - 90   | Turn        | $\alpha 2$ - $\alpha 3$ loop    | 355 - 359 | Beta strand | $\beta 22$                     |
| 91 - 102  | Helix       | $\alpha 3$                      | 366 - 384 | Helix       | $\alpha 23$                    |
| 103-109   | Turn        | $\alpha 3$ - $\alpha 4$ loop    | 385 - 387 | Turn        | $\alpha 23$ - $\alpha 24$ loop |
| 110 - 129 | Helix       | $\alpha 4$                      | 390 - 392 | Helix       | $\alpha 24$                    |
| 131 - 134 | Beta strand | $\beta 5$                       | 396 - 399 | Beta strand | $\beta 25$                     |
| 137 - 143 | Beta strand | $\beta 6$                       | 400 - 413 | Helix       | $\alpha 26$                    |
| 144 - 146 | Turn        | $\beta 6$ - $\alpha 7$ loop     | 415 - 420 | Helix       | $\alpha 27$                    |
| 148 - 154 | Helix       | $\alpha 7$                      | 422 - 426 | Turn        | $\alpha 27$ - $\alpha 28$ loop |
| 158 - 171 | Helix       | $\alpha 8$                      | 432 - 446 | Helix       | $\alpha 28$                    |
| 173 - 193 | Helix       | $\alpha 9$                      | 449 - 465 | Helix       | $\alpha 29$                    |
| 196- 198  | Beta strand | $\beta 10$                      | 466 - 468 | Beta strand | $\beta 30$                     |
| 199 - 204 | Helix       | $\alpha 11$                     | 470 - 472 | Helix       | $\alpha 31$                    |
| 205 - 207 | Turn        | $\alpha 11$ - $\alpha 12$ loop  | 473 - 483 | Helix       | $\alpha 32$                    |
| 213 - 215 | Turn        | $\alpha 11$ - $\alpha 12$ loop  | 486 - 488 | Beta strand | $\beta 33$                     |
| 220 - 251 | Helix       | $\alpha 12$                     | 499 - 502 | Helix       | $\alpha 34$                    |
| 253 - 255 | Turn        | $\alpha 11$ - $\beta 13$ loop   | 504 - 507 | Helix       | $\alpha 35$                    |
| 258 - 260 | Beta strand | $\beta 13$                      | 514 - 531 | Helix       | $\alpha 36$                    |
| 264 - 266 | Helix       | $\alpha 14$                     | 532 - 534 | Turn        | $\alpha 36$ - $\alpha 37$ loop |
| 267 - 271 | Beta strand | $\beta 15$                      | 539 - 541 | Helix       | $\alpha 37$                    |
| 276 - 278 | Helix       | $\alpha 16$                     | 548 - 558 | Helix       | $\alpha 38$                    |
| 279 - 282 | Helix       | $\alpha 17$                     | 559 - 562 | Turn        | $\alpha 38$ - $\alpha 39$ loop |
| 284 - 287 | Turn        | $\alpha 17$ - $\alpha 18$ loop  | 566 - 574 | Helix       | $\alpha 39$                    |
| 294 - 297 | Turn        | $\alpha 17$ - $\alpha 18$ loop  | 575 - 578 | Beta strand | $\beta 40$                     |
| 298 - 300 | Helix       | $\alpha 18$                     | 582 - 598 | Helix       | $\alpha 41$                    |
| 304 - 316 | Helix       | $\alpha 19$                     | 600 - 602 | Beta strand | $\beta 42$                     |
| 317 - 319 | Turn        | $\alpha 219$ - $\alpha 20$ loop | 607 - 611 | Beta strand | $\beta 43$                     |
| 327 - 330 | Helix       | $\alpha 20$                     |           |             |                                |

**Table S2.** CV-CNN layers details.

| <b>Layer Property</b> | <b>Conv2D</b> | <b>Conv2D</b> | <b>Dense</b> | <b>Classification</b> | <b>Regression</b> |
|-----------------------|---------------|---------------|--------------|-----------------------|-------------------|
| Kernel initializer    | He uniform    | He uniform    | He uniform   | Glorot uniform        | Glorot uniform    |
| Kernel regularizer    | L1, 0.00001   | L1, 0.00001   | L1, 0.00001  | 0                     | 0                 |
| Kernel size           | (4, 4)        | (4, 4)        | N/A          | N/A                   | N/A               |
| Activation            | ReLU          | ReLU          | ReLU         | SoftMax               | Linear            |
| Dropout               | 0             | 0             | 0.4          | 0                     | 0                 |
| Filters               | 32            | 32            | N/A          | N/A                   | N/A               |
| Data format           | Channel last  | Channel last  | N/A          | N/A                   | N/A               |
| Padding               | Same          | Same          | N/A          | N/A                   | N/A               |
| Neurons               | N/A           | N/A           | 64           | 2                     | 1                 |

**Table S3.** Un-refined REDAN paths with respective costs.

| Source | Cost     | Residues                                                                                                                         |
|--------|----------|----------------------------------------------------------------------------------------------------------------------------------|
| 59     | 149.2524 | 59, 50, 54, 51, 349, 379, 375, 378, 402, 399, 517, 513, 516, 453, 512, 505, 509, 506, 503, 127                                   |
| 60     | 116.4176 | 60, 64, 61, 65, 62, 47, 349, 379, 375, 378, 402, 399, 517, 513, 516, 453, 512, 505, 509, 506, 503, 127                           |
| 61     | 70.3623  | 61, 65, 62, 47, 349, 379, 375, 378, 402, 399, 517, 513, 516, 453, 512, 505, 509, 506, 503, 127                                   |
| 62     | 50.9962  | 62, 47, 349, 379, 375, 378, 402, 399, 517, 513, 516, 453, 512, 505, 509, 506, 503, 127                                           |
| 63     | 88.1584  | 63, 66, 62, 47, 349, 379, 375, 378, 402, 399, 517, 513, 516, 453, 512, 505, 509, 506, 503, 127                                   |
| 64     | 89.9224  | 64, 61, 65, 62, 47, 349, 379, 375, 378, 402, 399, 517, 513, 516, 453, 512, 505, 509, 506, 503, 127                               |
| 65     | 60.2454  | 65, 62, 47, 349, 379, 375, 378, 402, 399, 517, 513, 516, 453, 512, 505, 509, 506, 503, 127                                       |
| 66     | 82.4471  | 66, 62, 47, 349, 379, 375, 378, 402, 399, 517, 513, 516, 453, 512, 505, 509, 506, 503, 127                                       |
| 67     | 100.0196 | 67, 71, 74, 78, 75, 79, 76, 32, 100, 96, 99, 102, 202, 190, 187, 509, 506, 503, 127                                              |
| 68     | 60.6018  | 68, 72, 32, 100, 96, 99, 102, 202, 190, 187, 509, 506, 503, 127                                                                  |
| 69     | 62.2136  | 69, 72, 32, 100, 96, 99, 102, 202, 190, 187, 509, 506, 503, 127                                                                  |
| 70     | 69.4227  | 70, 74, 78, 75, 79, 76, 32, 100, 96, 99, 102, 202, 190, 187, 509, 506, 503, 127                                                  |
| 71     | 60.9140  | 71, 74, 78, 75, 79, 76, 32, 100, 96, 99, 102, 202, 190, 187, 509, 506, 503, 127                                                  |
| 72     | 47.4559  | 72, 32, 100, 96, 99, 102, 202, 190, 187, 509, 506, 503, 127                                                                      |
| 73     | 58.6718  | 73, 77, 80, 76, 32, 100, 96, 99, 102, 202, 190, 187, 509, 506, 503, 127                                                          |
| 74     | 55.7830  | 74, 78, 75, 79, 76, 32, 100, 96, 99, 102, 202, 190, 187, 509, 506, 503, 127                                                      |
| 75     | 48.9291  | 75, 79, 76, 32, 100, 96, 99, 102, 202, 190, 187, 509, 506, 503, 127                                                              |
| 76     | 45.9068  | 76, 32, 100, 96, 99, 102, 202, 190, 187, 509, 506, 503, 127                                                                      |
| 77     | 54.1053  | 77, 80, 76, 32, 100, 96, 99, 102, 202, 190, 187, 509, 506, 503, 127                                                              |
| 344    | 57.5303  | 344, 368, 346, 359, 332, 360, 307, 310, 314, 373, 409, 374, 405, 378, 402, 399, 517, 513, 516, 453, 512, 505, 509, 506, 503, 127 |
| 345    | 57.1416  | 345, 368, 346, 359, 332, 360, 307, 310, 314, 373, 409, 374, 405, 378, 402, 399, 517, 513, 516, 453, 512, 505, 509, 506, 503, 127 |
| 346    | 46.9889  | 346, 359, 332, 360, 307, 310, 314, 373, 409, 374, 405, 378, 402, 399, 517, 513, 516, 453, 512, 505, 509, 506, 503, 127           |

|     |         |                                                                                                                                       |
|-----|---------|---------------------------------------------------------------------------------------------------------------------------------------|
| 347 | 35.7958 | 347, 375, 378, 402, 399, 517, 513, 516, 453, 512, 505, 509, 506, 503, 127                                                             |
| 348 | 38.0116 | 348, 375, 378, 402, 399, 517, 513, 516, 453, 512, 505, 509, 506, 503, 127                                                             |
| 349 | 37.9870 | 349, 379, 375, 378, 402, 399, 517, 513, 516, 453, 512, 505, 509, 506, 503, 127                                                        |
| 350 | 31.3724 | 350, 382, 385, 401, 378, 402, 399, 517, 513, 516, 453, 512, 505, 509, 506, 503, 127                                                   |
| 351 | 61.8150 | 351, 357, 348, 375, 378, 402, 399, 517, 513, 516, 453, 512, 505, 509, 506, 503, 127                                                   |
| 352 | 61.1138 | 352, 41, 38, 35, 32, 100, 96, 99, 102, 202, 190, 187, 509, 506, 503, 127                                                              |
| 353 | 61.1542 | 353, 41, 38, 35, 32, 100, 96, 99, 102, 202, 190, 187, 509, 506, 503, 127                                                              |
| 355 | 62.2056 | 355, 41, 38, 35, 32, 100, 96, 99, 102, 202, 190, 187, 509, 506, 503, 127                                                              |
| 356 | 37.8468 | 356, 382, 385, 401, 378, 402, 399, 517, 513, 516, 453, 512, 505, 509, 506, 503, 127                                                   |
| 357 | 39.6737 | 357, 348, 375, 378, 402, 399, 517, 513, 516, 453, 512, 505, 509, 506, 503, 127                                                        |
| 358 | 43.5352 | 358, 48, 357, 348, 375, 378, 402, 399, 517, 513, 516, 453, 512, 505, 509, 506, 503, 127                                               |
| 359 | 41.8726 | 359, 332, 360, 307, 310, 314, 373, 409, 374, 405, 378, 402, 399, 517, 513, 516, 453, 512, 505, 509, 506, 503, 127                     |
| 360 | 37.5957 | 360, 307, 310, 314, 373, 409, 374, 405, 378, 402, 399, 517, 513, 516, 453, 512, 505, 509, 506, 503, 127                               |
| 361 | 71.4523 | 361, 344, 368, 346, 359, 332, 360, 307, 310, 314, 373, 409, 374, 405, 378, 402, 399, 517, 513, 516, 453, 512, 505, 509, 506, 503, 127 |
| 363 | 60.5551 | 363, 344, 368, 346, 359, 332, 360, 307, 310, 314, 373, 409, 374, 405, 378, 402, 399, 517, 513, 516, 453, 512, 505, 509, 506, 503, 127 |

---

**Table S4.** Cost comparison for best path between REDAN and ML-weighted REDAN.

| <b>Path</b>                       | <b>Cost</b> |
|-----------------------------------|-------------|
| REDAN Path (Raw)                  | 31.3724     |
| REDAN Path (State 2, ML weighted) | 31.1855     |
| REDAN Path (State 3, ML weighted) | 29.2688     |

## Machine learning model regularization

Dropout avoids the co-adaptation of neurons in feature detection by randomly dropping a percentage of neurons during the training process. This procedure ensures the lack of overfitting by forcing the network to not rely only on specific neurons.

On the other hand, L1 regularizer, or lasso regression, adds a penalty term to the layers loss functions that will force the least important features to zero. The L1 regularizer has the form:

$$\sum_{i=1}^N (y_i - \sum_j x_{ij} \beta_j)^2 + \lambda \sum_{j=1}^p |\beta_j|$$

In the above equation  $i$  are the instances,  $j$  the number of features,  $y$  is the real target value,  $x_{ij} \beta_j$  forms the predicted  $y$  with  $x$  being the input data and  $\beta$  the model parameters. While the left side of the formula represent a standard linear regression, the right side represents the penalization term, with  $\lambda$  being shrinkage parameter. This implementation, on top of functioning as a data regularization to avoid overfitting, is expected to help selecting important bonding pattern within the network as it forces the values of unimportant features to zero.

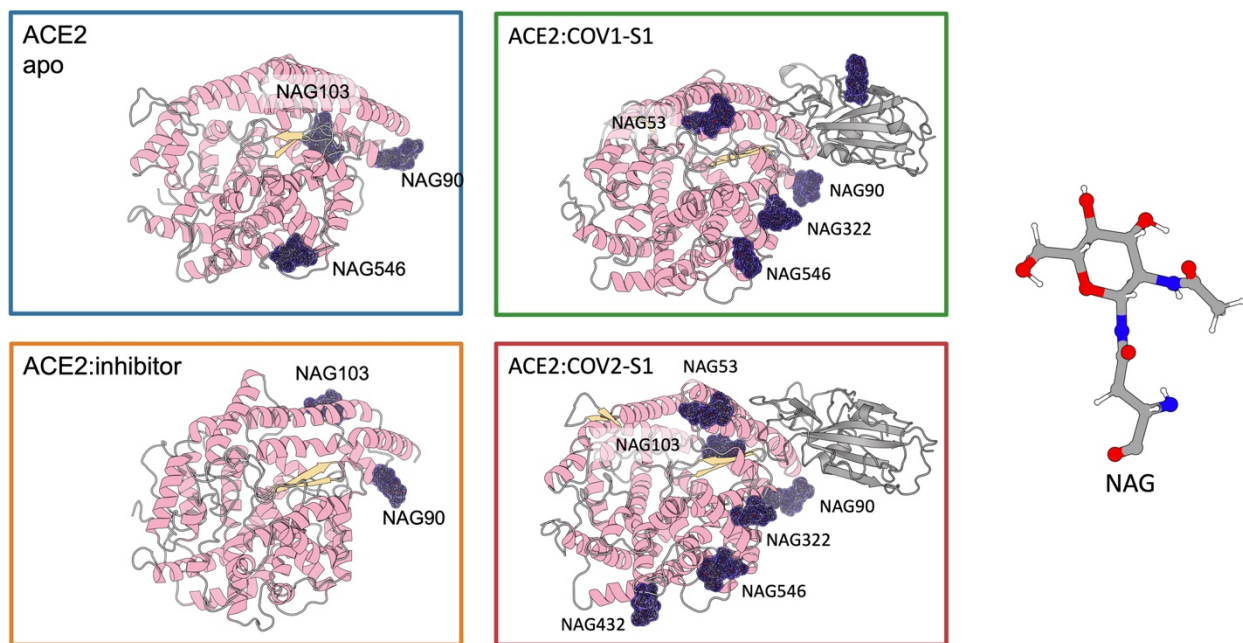

**Fig. S1.** Glycosylation profile of the systems analyzed.

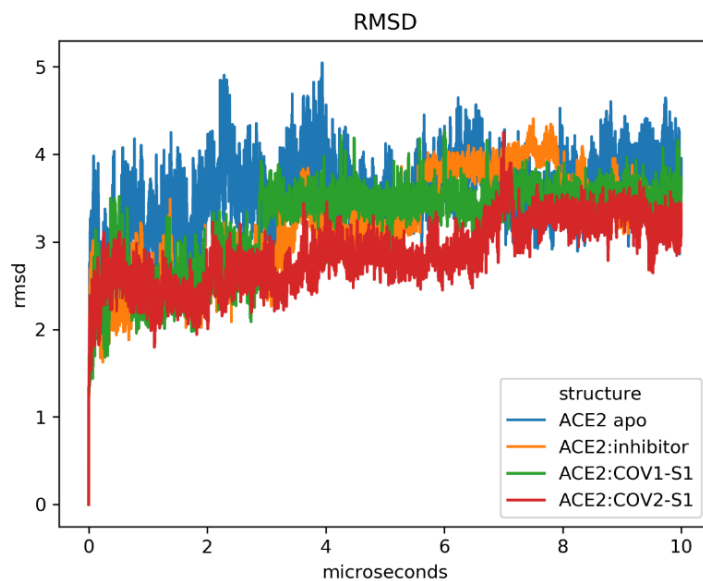

**Fig. S2.** Root Mean Square Deviation (RMSD) analysis of ACE2 PD in different systems.



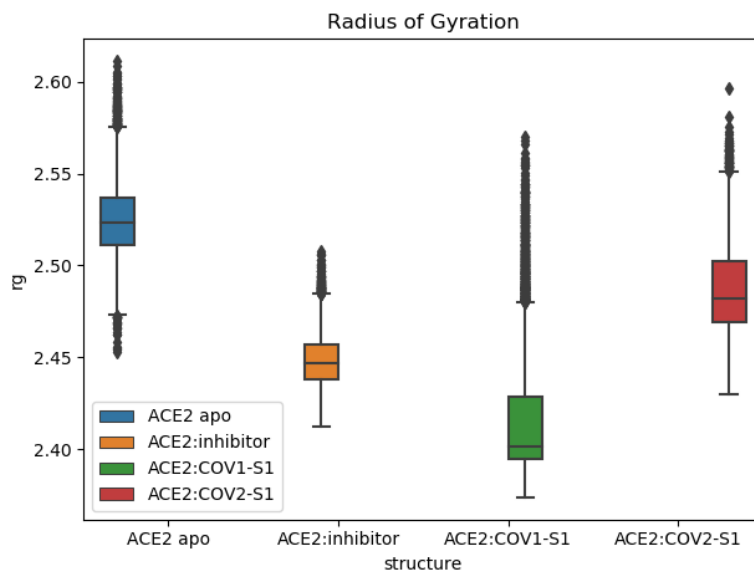

**Fig. S3.** Radius of Gyration analysis for ACE2 PD in multiple systems.

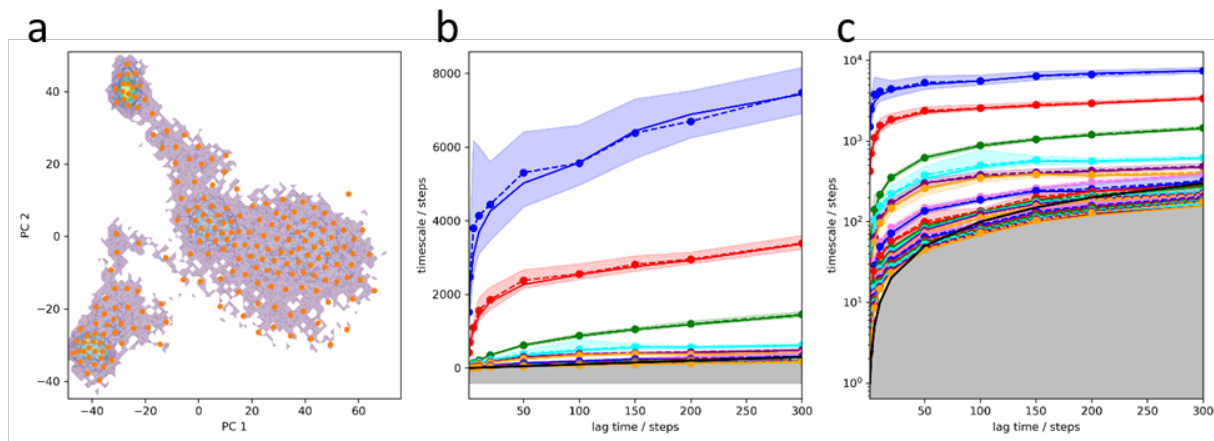

**Fig. S4.** Kinetic clustering of ACE2 PD conformational space. a) K-means microclustering of ACE2 PD conformational space. b) Relaxation timescales of ACE2 PD at different lag times. c) Log values of relaxation timescales of ACE2 PD at different lag times.

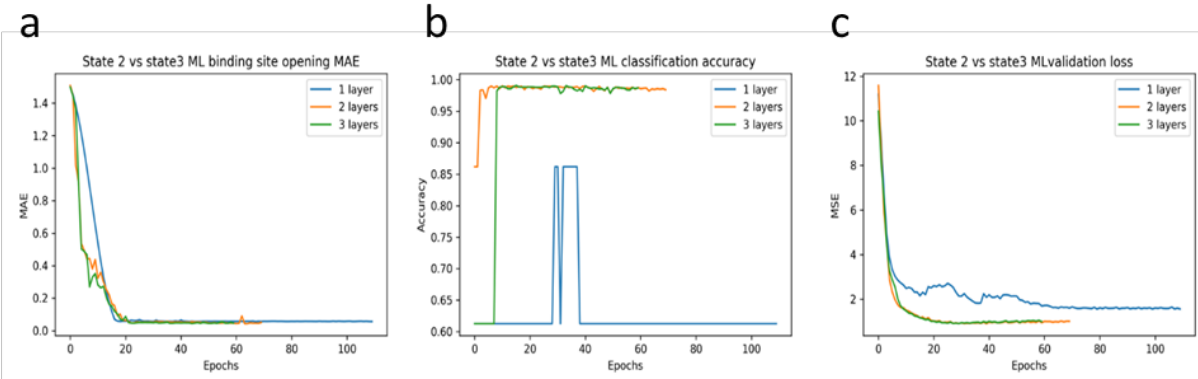

**Fig. S5.** Validation of CV-CNN model. a) Mean Average Error of binding site opening regression task. b) Classification accuracy; c) Model validation loss.

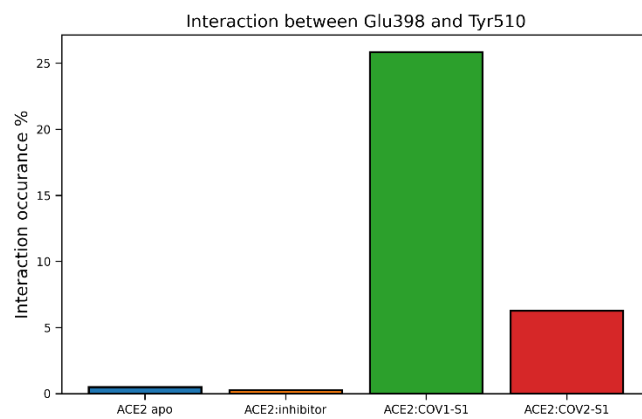

**Fig. S6.** Interaction between Glu398 and Tyr510. This interaction is measured as percentage of frames where these two residues are found at a distance lower than 4 Å.

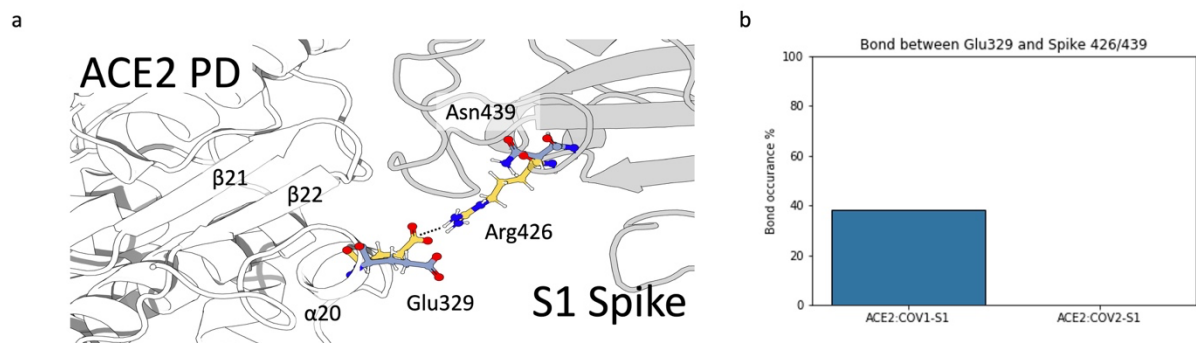

**Fig. S7.** a) Interaction between ACE2 PD Glu329 with SARS-CoV-1 spike Arg426 (yellow) vs SARS-CoV-2 spike Asn439 (blue). b) Percentage of bond occurrence between ACE2 PD Glu329 with SARS-CoV-1 spike Arg426 (ACE2:COV1-S1) vs SARS-CoV-2 spike Asn439 (ACE2:COV2-S1). The percentage is measured based on the number of frames where the pair of residues was at a distance smaller than 4 Å.
